# Supplementary material for: Retinal Aging in 3× Tg-AD Mice Model of Alzheimer's Disease
Source: PubMed Central journal article supplement (PMC9244797; doi:10.3389/fnagi.2022.832195), 2022-06-16
Supplement: Data_Sheet_1.pdf [file Data_Sheet_1.pdf]

## Supplementary Material

### 1 DATA

Data characterization is shown in table S1.

### 2 STATISTICS

Discriminate p-values for the Kolmogorov–Smirnov and Mann-Whitney test are shown in table S2. All tests were performed with the IBM SPSS 27 software.

### 3 EXPLAINABILITY

Given the ‘black-box’ nature of deep learning, multiple methods to improve the explainability of these models have been suggested. We applied deep Taylor decomposition to break down the final decision into individual contributions by relevance backpropagation Montavon et al. (2017). Heatmaps that represent the relative relevance of each pixel were derived.

Supplementary figure S1 shows a selection of images for each time-point and the respective heatmaps. As shown, it appears that time-point-specific patterns emerge. Between time-points 2 and 8, the focus is in the neural-retina. For time-points 1, 12, and 16, the pattern is more diffused, centered in the posterior retina expanding up to the neural-retina. Although these methods provide an important insight, they are still limited, as we are still left unaware of how these patterns link with age.

### REFERENCES

Montavon G, Lapuschkin S, Binder A, Samek W, Müller KR. Explaining nonlinear classification decisions with deep taylor decomposition. *Pattern Recognition* **65** (2017) 211–222. doi:<https://doi.org/10.1016/j.patcog.2016.11.008>.

**Table S1.** Data characterization of datasets 1 and 2 (DS1 and DS2, respectively)

| DS1        |        |                |           |            |             |
|------------|--------|----------------|-----------|------------|-------------|
| Time-Point | # Mice | # Acquisitions | # B-scans | % Left Eye | % Wild-type |
| 1          | 90     | 178            | 1770      | 50.8       | 51.2        |
| 2          | 89     | 178            | 1769      | 48.6       | 48.2        |
| 3          | 84     | 168            | 1738      | 48.6       | 47.8        |
| 4          | 83     | 166            | 1681      | 49.1       | 49.0        |
| 8          | 78     | 156            | 1577      | 49.5       | 51.2        |
| 12         | 75     | 150            | 1572      | 50.5       | 49.4        |
| 16         | 71     | 141            | 1440      | 51.3       | 52.7        |
| DS2        |        |                |           |            |             |
| Time-Point | # Mice | # Acquisitions | # B-scans | % Left Eye | % Wild-type |
| 1          | 23     | 45             | 426       | 48.4       | 52.1        |
| 2          | 24     | 48             | 518       | 51.7       | 48.3        |
| 3          | 23     | 46             | 482       | 51.0       | 50.6        |
| 4          | 23     | 46             | 507       | 53.3       | 52.2        |
| 8          | 22     | 41             | 451       | 49.0       | 54.0        |
| 12         | 20     | 40             | 421       | 49.2       | 55.3        |
| 16         | 20     | 40             | 388       | 49.0       | 50.3        |

**Table S2.** Detailed p-values for the Kolmogorov–Smirnov and Mann-Whitney U tests performed with the IBM SPSS 27 software.

| <b>Kolmogorov–Smirnov</b> |                       |                       |                       |                       |
|---------------------------|-----------------------|-----------------------|-----------------------|-----------------------|
| Time-Point                | Wild-Type Trained     |                       | 3×Tg-AD Trained       |                       |
|                           | Wild-Type             | 3×Tg-AD               | Wild-Type             | 3×Tg-AD               |
| 1                         | $3.27 \times 10^{-3}$ | $9.93 \times 10^{-6}$ | $7.21 \times 10^{-1}$ | $2.16 \times 10^{-4}$ |
| 2                         | $1.88 \times 10^{-1}$ | $1.23 \times 10^{-2}$ | $2.51 \times 10^{-3}$ | $1.02 \times 10^{-2}$ |
| 3                         | $6.39 \times 10^{-1}$ | $2.87 \times 10^{-1}$ | $8.10 \times 10^{-3}$ | $2.80 \times 10^{-3}$ |
| 4                         | $7.65 \times 10^{-3}$ | $8.29 \times 10^{-2}$ | $7.16 \times 10^{-3}$ | $1.52 \times 10^{-2}$ |
| 8                         | $1.36 \times 10^{-2}$ | $6.21 \times 10^{-4}$ | $2.44 \times 10^{-3}$ | $5.52 \times 10^{-4}$ |
| 12                        | $2.83 \times 10^{-3}$ | $1.12 \times 10^{-3}$ | $1.04 \times 10^{-1}$ | $1.73 \times 10^{-2}$ |
| 16                        | $3.70 \times 10^{-4}$ | $5.02 \times 10^{-5}$ | $3.48 \times 10^{-1}$ | $1.64 \times 10^{-2}$ |
| <b>Mann-Whitney U</b>     |                       |                       |                       |                       |
| Time-Point                | Wild-Type Trained     |                       | 3×Tg-AD Trained       |                       |
| 1                         | $3.18 \times 10^{-4}$ |                       | $4.15 \times 10^{-1}$ |                       |
| 2                         | $5.62 \times 10^{-2}$ |                       | $6.01 \times 10^{-3}$ |                       |
| 3                         | $1.27 \times 10^{-1}$ |                       | $3.08 \times 10^{-3}$ |                       |
| 4                         | $5.83 \times 10^{-2}$ |                       | $1.23 \times 10^{-2}$ |                       |
| 8                         | $3.11 \times 10^{-3}$ |                       | $2.54 \times 10^{-3}$ |                       |
| 12                        | $1.19 \times 10^{-3}$ |                       | $6.09 \times 10^{-3}$ |                       |
| 16                        | $1.33 \times 10^{-4}$ |                       | $4.73 \times 10^{-2}$ |                       |

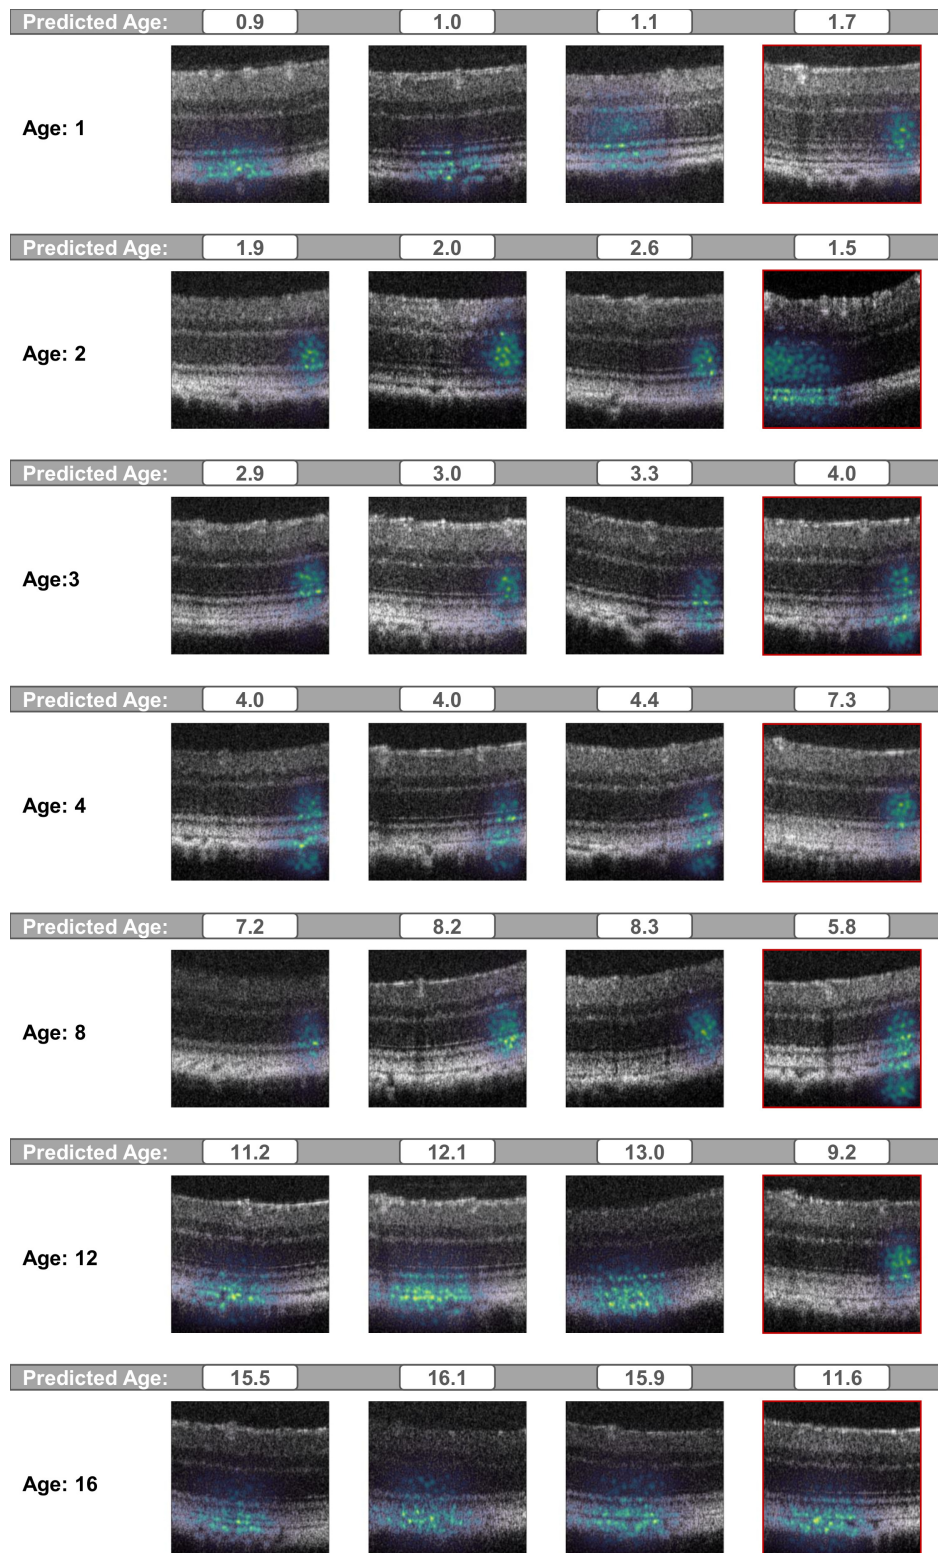

**Figure S1.** Selection of images for each time-point overlaid with the respective relative relevance of each pixel obtained by deep Taylor decomposition. Real age and predicted age in months are shown. All images on the right, outlined in red, are examples of considerable prediction errors.
